# Supplementary material
Source: publisher site journal article supplement (https://www.dovepress.com/article/330700)

**Table S1** Summary of up-regulated and down-regulated metabolites in *ANGPTL8/betatrophin* gene knockout and wild type HepG2/IR cells

| No.                   | RT (min) | <i>m/z</i> | Exact mass | ppm   | Formula                                                       | Metabolites                        | VIP  | <i>p</i> value |
|-----------------------|----------|------------|------------|-------|---------------------------------------------------------------|------------------------------------|------|----------------|
| <b>Up-regulated</b>   |          |            |            |       |                                                               |                                    |      |                |
| 1                     | 727.26   | 181.01     | 180.0634   | 0.49  | C <sub>6</sub> H <sub>12</sub> O <sub>6</sub>                 | D-Mannose                          | 1.42 | 0.003          |
| 2                     | 89.33    | 265.11     | 265.1123   | 3.44  | C <sub>12</sub> H <sub>17</sub> N <sub>4</sub> O <sub>5</sub> | Thiamine                           | 1.63 | 0.005          |
| 3                     | 691.50   | 180.97     | 164.0685   | 4.03  | C <sub>6</sub> H <sub>12</sub> O <sub>5</sub>                 | L-Fucose                           | 1.29 | 0.005          |
| 4                     | 90.80    | 147.08     | 146.1055   | 9.30  | C <sub>6</sub> H <sub>14</sub> N <sub>2</sub> O <sub>2</sub>  | L-Lysine                           | 1.66 | 0.005          |
| 5                     | 222.77   | 115.04     | 116.0473   | 13.41 | C <sub>5</sub> H <sub>8</sub> O <sub>3</sub>                  | alpha-Ketoisovaleric acid          | 1.02 | 0.045          |
| 6                     | 86.26    | 195.05     | 196.0583   | 2.14  | C <sub>6</sub> H <sub>12</sub> O <sub>7</sub>                 | Gluconic acid                      | 1.47 | 0.005          |
| 7                     | 128.14   | 162.05     | 162.0528   | 0.55  | C <sub>6</sub> H <sub>10</sub> O <sub>5</sub>                 | 2-Deoxy-scylo-inosose              | 1.65 | 0.005          |
| 8                     | 120.62   | 131.97     | 132.0423   | 1.97  | C <sub>5</sub> H <sub>8</sub> O <sub>4</sub>                  | Glutaric acid                      | 1.36 | 0.005          |
| 9                     | 125.95   | 187.11     | 188.1161   | 3.13  | C <sub>8</sub> H <sub>16</sub> N <sub>2</sub> O <sub>3</sub>  | N <sub>6</sub> -Acetyl-L-lysine    | 1.58 | 0.005          |
| 10                    | 94.76    | 211.00     | 230.0192   | 0.22  | C <sub>5</sub> H <sub>11</sub> O <sub>8</sub> P               | alpha-D-Ribose 1-phosphate         | 1.49 | 0.005          |
| 11                    | 125.04   | 256.08     | 256.0821   | 3.22  | C <sub>11</sub> H <sub>14</sub> N <sub>6</sub> O <sub>6</sub> | Nicotinate D-ribonucleoside        | 1.29 | 0.005          |
| 12                    | 828.61   | 111.02     | 111.032    | 0.88  | C <sub>5</sub> H <sub>5</sub> N <sub>2</sub> O <sub>2</sub>   | Pyrrole-2-carboxylic acid          | 1.15 | 0.020          |
| 13                    | 740.72   | 301.28     | 301.2981   | 5.46  | C <sub>18</sub> H <sub>39</sub> N <sub>2</sub> O <sub>2</sub> | Sphinganine                        | 1.40 | 0.005          |
| 14                    | 351.16   | 131.05     | 148.0524   | 0.30  | C <sub>9</sub> H <sub>8</sub> O <sub>2</sub>                  | trans-Cinnamate                    | 1.38 | 0.005          |
| <b>Down-regulated</b> |          |            |            |       |                                                               |                                    |      |                |
| 1                     | 390.85   | 137.02     | 138.0317   | 0.20  | C <sub>7</sub> H <sub>6</sub> O <sub>3</sub>                  | Salicylic acid                     | 1.30 | 0.013          |
| 2                     | 409.21   | 118.06     | 117.0578   | 1.44  | C <sub>8</sub> H <sub>7</sub> N                               | Indole                             | 1.53 | 0.005          |
| 3                     | 292.70   | 136.06     | 136.0524   | 0.54  | C <sub>8</sub> H <sub>8</sub> O <sub>2</sub>                  | 4-Hydroxyphenylacetaldehyde        | 1.11 | 0.031          |
| 4                     | 93.10    | 118.05     | 119.0582   | 1.76  | C <sub>4</sub> H <sub>9</sub> N <sub>3</sub> O <sub>3</sub>   | L-Allothreonine                    | 1.42 | 0.005          |
| 5                     | 368.95   | 220.12     | 219.1107   | 1.57  | C <sub>9</sub> H <sub>17</sub> N <sub>5</sub> O <sub>5</sub>  | Pantothenic acid                   | 1.08 | 0.045          |
| 6                     | 151.24   | 104.05     | 104.0473   | 1.32  | C <sub>4</sub> H <sub>8</sub> O <sub>3</sub>                  | 2-Hydroxybutyric acid              | 1.57 | 0.005          |
| 7                     | 91.73    | 102.06     | 101.0477   | 0.13  | C <sub>4</sub> H <sub>7</sub> N <sub>2</sub> O <sub>2</sub>   | 1-Aminocyclopropanecarboxylic acid | 1.45 | 0.005          |

|    |        |        |          |       |               |                         |      |       |
|----|--------|--------|----------|-------|---------------|-------------------------|------|-------|
| 8  | 140.16 | 149.05 | 149.051  | 6.20  | C5H11NO2S     | L-Methionine            | 1.53 | 0.005 |
| 9  | 150.95 | 123.06 | 122.048  | 0.48  | C6H6N2O       | Niacinamide             | 1.34 | 0.005 |
| 10 | 452.50 | 300.20 | 300.2089 | 1.19  | C20H28O2      | all-trans-Retinoic acid | 1.10 | 0.031 |
| 11 | 110.23 | 118.09 | 117.079  | 0.58  | C5H11NO2      | 5-Aminopentanoic acid   | 1.63 | 0.005 |
| 12 | 84.66  | 132.03 | 133.0375 | 0.70  | C4H7NO4       | L-Aspartic acid         | 1.60 | 0.005 |
| 13 | 247.99 | 86.10  | 85.0891  | 4.61  | C5H11N        | Piperidine              | 1.65 | 0.005 |
| 14 | 96.14  | 89.02  | 90.0317  | 0.02  | C3H6O3        | L-Lactic acid           | 1.38 | 0.005 |
| 15 | 201.41 | 134.99 | 136.0385 | 2.12  | C5H4N4O       | Hypoxanthine            | 1.57 | 0.005 |
| 16 | 269.76 | 178.05 | 179.0582 | 0.03  | C9H9NO3       | Hippuric acid           | 1.55 | 0.005 |
| 17 | 342.88 | 137.05 | 137.0477 | 14.85 | C7H7NO2       | 2-Aminobenzoic acid     | 1.61 | 0.005 |
| 18 | 124.58 | 112.05 | 111.0433 | 0.00  | C4H5N3O       | Cytosine                | 1.65 | 0.005 |
| 19 | 124.58 | 244.09 | 243.0855 | 0.23  | C9H13N3O5     | Cytidine                | 1.64 | 0.005 |
| 20 | 150.76 | 664.12 | 664.1169 | 4.82  | C21H28N7O14P2 | NAD                     | 1.52 | 0.005 |
| 21 | 247.46 | 132.10 | 131.0946 | 1.98  | C6H13NO2      | L-Leucine               | 1.65 | 0.005 |
| 22 | 80.08  | 117.02 | 118.0266 | 0.23  | C4H6O4        | Succinic acid           | 1.60 | 0.005 |
| 23 | 488.20 | 295.13 | 294.1216 | 2.19  | C14H18N2O5    | Aspartame               | 1.63 | 0.005 |
| 24 | 145.08 | 112.02 | 112.0273 | 1.84  | C4H4N2O2      | Uracil                  | 1.56 | 0.005 |
| 25 | 305.40 | 168.07 | 169.0739 | 0.07  | C8H11NO3      | Pyridoxine              | 1.57 | 0.005 |
| 26 | 139.25 | 243.06 | 244.0695 | 2.30  | C9H12N2O6     | Pseudouridine           | 1.56 | 0.005 |
| 27 | 325.12 | 251.08 | 252.0859 | 3.76  | C10H12N4O4    | Deoxyinosine            | 1.46 | 0.005 |
| 28 | 458.82 | 377.15 | 376.1383 | 0.52  | C17H20N4O6    | Riboflavin              | 1.63 | 0.005 |
| 29 | 792.02 | 105.04 | 104.011  | 0.96  | C3H4O4        | Hydroxypyruvic acid     | 1.03 | 0.020 |
| 30 | 150.31 | 166.05 | 165.046  | 0.00  | C5H11NO3S     | L-Methionine S-oxide    | 1.66 | 0.005 |
| 31 | 382.78 | 203.08 | 204.0899 | 0.02  | C11H12N2O2    | L-Tryptophan            | 1.58 | 0.005 |
| 32 | 74.29  | 146.03 | 146.0215 | 1.04  | C5H6O5        | Oxoglutaric acid        | 1.64 | 0.005 |
| 33 | 225.63 | 132.14 | 131.0946 | 1.53  | C6H13NO2      | L-Isoleucine            | 1.64 | 0.005 |

|    |        |        |          |       |            |                                          |      |       |
|----|--------|--------|----------|-------|------------|------------------------------------------|------|-------|
| 34 | 44.14  | 85.07  | 102.0681 | 2.59  | C5H10O2    | Ethylmethylacetic acid                   | 1.35 | 0.005 |
| 35 | 74.32  | 94.05  | 94.0419  | 0.46  | C6H6O      | Phenol                                   | 1.66 | 0.005 |
| 36 | 298.82 | 125.03 | 126.0429 | 13.50 | C5H6N2O2   | Thymine                                  | 1.59 | 0.005 |
| 37 | 494.61 | 136.08 | 135.0684 | 2.74  | C8H9NO     | 2-Phenylacetamide                        | 1.16 | 0.013 |
| 38 | 303.41 | 227.07 | 228.0746 | 1.25  | C9H12N2O5  | Deoxyuridine                             | 1.58 | 0.005 |
| 39 | 320.46 | 440.13 | 441.1397 | 1.72  | C19H19N7O6 | Folic acid                               | 1.61 | 0.005 |
| 40 | 483.44 | 204.12 | 204.111  | 0.24  | C8H16N2O4  | N6-Acetyl-N6-hydroxy-L-lysine            | 1.62 | 0.005 |
| 41 | 97.18  | 122.03 | 121.0197 | 0.83  | C3H7NO2S   | D-Cysteine                               | 1.60 | 0.005 |
| 42 | 102.95 | 220.08 | 221.0899 | 0.08  | C8H15NO6   | N-Acetyl-D-glucosamine                   | 1.59 | 0.005 |
| 43 | 131.74 | 146.09 | 145.0851 | 0.75  | C5H11N3O2  | 4-Guanidinobutanoic acid                 | 1.65 | 0.005 |
| 44 | 304.53 | 252.11 | 251.102  | 0.04  | C10H13N5O3 | 2-Deoxyadenosine                         | 1.57 | 0.005 |
| 45 | 99.01  | 284.05 | 301.0563 | 11.97 | C8H16NO9P  | N-Acetyl-alpha-D-glucosamine 1-phosphate | 1.61 | 0.005 |
| 46 | 392.62 | 193.07 | 193.0739 | 10.66 | C10H11NO3  | Phenylacetylglycine                      | 1.60 | 0.005 |
| 47 | 327.90 | 266.09 | 267.0968 | 0.08  | C10H13N5O4 | Deoxyguanosine                           | 1.57 | 0.005 |
| 48 | 129.58 | 192.03 | 192.027  | 1.65  | C6H8O7     | Isocitric acid                           | 1.65 | 0.005 |
| 49 | 358.06 | 182.04 | 183.0532 | 6.66  | C8H9NO4    | 4-Pyridoxic acid                         | 1.52 | 0.005 |
| 50 | 106.18 | 324.06 | 323.0519 | 0.04  | C9H14N3O8P | CMP                                      | 1.66 | 0.005 |
| 51 | 95.62  | 323.03 | 324.0359 | 1.93  | C9H13N2O9P | UMP                                      | 1.57 | 0.005 |
| 52 | 226.73 | 166.07 | 166.063  | 1.02  | C9H10O3    | D-Phenyllactic acid                      | 1.64 | 0.005 |
| 53 | 74.70  | 89.11  | 88.1     | 0.67  | C4H12N2    | Putrescine                               | 1.66 | 0.005 |
| 54 | 308.26 | 152.06 | 151.0494 | 0.62  | C5H5N5O    | Guanine                                  | 1.66 | 0.005 |
| 55 | 94.94  | 162.11 | 161.1052 | 1.40  | C7H15NO3   | L-Carnitine                              | 1.67 | 0.005 |
| 56 | 393.31 | 136.06 | 135.0545 | 0.68  | C5H5N5     | Adenine                                  | 1.66 | 0.005 |
| 57 | 317.59 | 282.08 | 283.0917 | 1.23  | C10H13N5O5 | Guanosine                                | 1.61 | 0.005 |
| 58 | 223.09 | 193.07 | 193.0739 | 2.09  | C10H11NO3  | 3-Carbamoyl-2-phenylpropionaldehyde      | 1.65 | 0.005 |
| 59 | 99.71  | 88.04  | 89.0477  | 0.36  | C3H7NO2    | Sarcosine                                | 1.57 | 0.005 |

|    |        |        |          |       |               |                            |      |       |
|----|--------|--------|----------|-------|---------------|----------------------------|------|-------|
| 60 | 223.28 | 385.13 | 384.1216 | 1.66  | C14H20N6O5S   | S-Adenosylhomocysteine     | 1.66 | 0.005 |
| 61 | 96.03  | 489.11 | 488.1073 | 6.11  | C14H26N4O11P2 | Citicoline                 | 1.55 | 0.005 |
| 62 | 104.42 | 362.05 | 363.058  | 2.09  | C10H14N5O8P   | GMP                        | 1.59 | 0.005 |
| 63 | 446.18 | 359.08 | 360.0845 | 2.32  | C18H16O8      | Rosmarinic acid            | 1.60 | 0.005 |
| 64 | 153.19 | 176.06 | 175.0481 | 0.15  | C6H9NO5       | N-Acetyl-L-aspartic acid   | 1.65 | 0.005 |
| 65 | 446.18 | 296.08 | 297.0896 | 0.24  | C11H15N5O3S   | 5-Methylthioadenosine      | 1.61 | 0.005 |
| 66 | 143.47 | 608.08 | 607.0816 | 7.82  | C17H27N3O17P2 | UDP-N-acetyl-D-mannosamine | 1.58 | 0.005 |
| 67 | 324.45 | 346.06 | 347.0631 | 1.18  | C10H14N5O7P   | 3-AMP                      | 1.61 | 0.005 |
| 68 | 99.78  | 130.06 | 131.0695 | 10.78 | C4H9N3O2      | Creatine                   | 1.59 | 0.005 |
| 69 | 198.08 | 321.05 | 322.0566 | 0.69  | C10H15N2O8P   | dTMP                       | 1.53 | 0.005 |

Notes: The metabolites were confirmed based on their exact molecular weights and characterized by comparisons with reference standards or MS/MS fragment information. RT, retention time; *m/z*, mass-to-charge ratio; VIP, variable importance in the project.

**Table S2** Metabolic pathways analyzed in the study

| Pathway                                             | Total | Hits | Raw p | -LOG(p) | Holm adjust | FDR  | Impact | compounds                                                             | pathway  |
|-----------------------------------------------------|-------|------|-------|---------|-------------|------|--------|-----------------------------------------------------------------------|----------|
| Pyrimidine metabolism                               | 60    | 9    | 0.000 | 8.76    | 0.01        | 0.01 | 0.36   | C00105;C00055;C00475;C00380;C00106;C00526;C00364;C00178;C02067        | hsa00240 |
| Lysine degradation                                  | 47    | 5    | 0.021 | 3.85    | 1.00        | 0.19 | 0.31   | C00047;C02727;C00489;C03955;C00431                                    | hsa00310 |
| Alanine, aspartate and glutamate metabolism         | 24    | 4    | 0.008 | 4.80    | 0.62        | 0.11 | 0.26   | C01042;C00049;C00026;C00042                                           | hsa00250 |
| Pantothenate and CoA biosynthesis                   | 27    | 4    | 0.013 | 4.37    | 0.93        | 0.14 | 0.25   | C00864;C00141;C00049;C00106                                           | hsa00770 |
| Phenylalanine metabolism                            | 45    | 7    | 0.001 | 7.26    | 0.06        | 0.03 | 0.23   | C05607;C02505;C00423;C01586;C05598;C00042;C00805                      | hsa00360 |
| Cysteine and methionine metabolism                  | 56    | 7    | 0.003 | 5.93    | 0.20        | 0.05 | 0.20   | C01234;C00170;C02989;C00073;C00021;C00793;C00049                      | hsa00270 |
| Tryptophan metabolism                               | 79    | 3    | 0.518 | 0.66    | 1.00        | 1.00 | 0.19   | C00078;C00463;C00108                                                  | hsa00380 |
| Vitamin B6 metabolism                               | 32    | 3    | 0.096 | 2.35    | 1.00        | 0.43 | 0.18   | C00314;C00026;C00847                                                  | hsa00750 |
| Retinol metabolism                                  | 22    | 1    | 0.540 | 0.62    | 1.00        | 1.00 | 0.18   | C00777                                                                | hsa00830 |
| Citrate cycle (TCA cycle)                           | 20    | 3    | 0.030 | 3.52    | 1.00        | 0.24 | 0.16   | C00042;C00026;C00311                                                  | hsa00020 |
| Riboflavin metabolism                               | 21    | 1    | 0.523 | 0.65    | 1.00        | 1.00 | 0.15   | C00255                                                                | hsa00740 |
| Sphingolipid metabolism                             | 25    | 1    | 0.586 | 0.53    | 1.00        | 1.00 | 0.14   | C00836                                                                | hsa00600 |
| Thiamine metabolism                                 | 24    | 1    | 0.571 | 0.56    | 1.00        | 1.00 | 0.12   | C00378                                                                | hsa00730 |
| Valine, leucine and isoleucine biosynthesis         | 27    | 3    | 0.064 | 2.75    | 1.00        | 0.36 | 0.12   | C00123;C00141;C00407                                                  | hsa00290 |
| Aminoacyl-tRNA biosynthesis                         | 75    | 6    | 0.042 | 3.16    | 1.00        | 0.31 | 0.11   | C00049;C00073;C00047;C00407;C00123;C00078                             | hsa00970 |
| Arginine and proline metabolism                     | 77    | 7    | 0.015 | 4.18    | 1.00        | 0.15 | 0.10   | C00049;C00300;C01035;C00134;C00431;C00213;C05942                      | hsa00330 |
| Lysine biosynthesis                                 | 32    | 3    | 0.096 | 2.35    | 1.00        | 0.43 | 0.10   | C00049;C00047;C00026                                                  | hsa00300 |
| Pentose phosphate pathway                           | 32    | 2    | 0.303 | 1.19    | 1.00        | 0.99 | 0.09   | C00620;C00257                                                         | hsa00030 |
| Purine metabolism                                   | 92    | 10   | 0.001 | 6.92    | 0.08        | 0.03 | 0.08   | C00559;C05512;C00147;C00144;C00262;C00242;C00330;C00387;C01367;C00620 | hsa00230 |
| Phenylalanine, tyrosine and tryptophan biosynthesis | 27    | 3    | 0.064 | 2.75    | 1.00        | 0.36 | 0.07   | C00463;C00078;C00108                                                  | hsa00400 |
| Glyoxylate and dicarboxylate metabolism             | 50    | 4    | 0.091 | 2.39    | 1.00        | 0.43 | 0.06   | C00168;C00026;C00311;C00042                                           | hsa00630 |
| Fructose and mannose metabolism                     | 48    | 2    | 0.498 | 0.70    | 1.00        | 1.00 | 0.05   | C00159;C00507                                                         | hsa00051 |

|                                             |    |   |       |      |      |      |      |                                           |          |
|---------------------------------------------|----|---|-------|------|------|------|------|-------------------------------------------|----------|
| Glycine, serine and threonine metabolism    | 48 | 6 | 0.005 | 5.22 | 0.41 | 0.09 | 0.05 | C00049;C00213;C00300;C00168;C05519;C00078 | hsa00260 |
| Pyruvate metabolism                         | 32 | 1 | 0.677 | 0.39 | 1.00 | 1.00 | 0.05 | C00256                                    | hsa00620 |
| Glycerophospholipid metabolism              | 39 | 1 | 0.748 | 0.29 | 1.00 | 1.00 | 0.04 | C00307                                    | hsa00564 |
| Nicotinate and nicotinamide metabolism      | 44 | 4 | 0.063 | 2.77 | 1.00 | 0.36 | 0.04 | C00049;C05841;C00153;C00003               | hsa00760 |
| Valine, leucine and isoleucine degradation  | 40 | 3 | 0.158 | 1.85 | 1.00 | 0.60 | 0.04 | C00123;C00141;C00407                      | hsa00280 |
| Amino sugar and nucleotide sugar metabolism | 88 | 4 | 0.361 | 1.02 | 1.00 | 1.00 | 0.02 | C00140;C04501;C01170;C00159               | hsa00520 |
| Drug metabolism - cytochrome P450           | 86 | 1 | 0.954 | 0.05 | 1.00 | 1.00 | 0.02 | C16587                                    | hsa00982 |
| Butanoate metabolism                        | 40 | 2 | 0.404 | 0.91 | 1.00 | 1.00 | 0.02 | C00042;C00026                             | hsa00650 |
| Glutathione metabolism                      | 38 | 1 | 0.739 | 0.30 | 1.00 | 1.00 | 0.02 | C00134                                    | hsa00480 |
| Tyrosine metabolism                         | 76 | 4 | 0.266 | 1.33 | 1.00 | 0.94 | 0.02 | C03765;C00146;C00042;C01850               | hsa00350 |
| Propanoate metabolism                       | 35 | 3 | 0.118 | 2.14 | 1.00 | 0.50 | 0.00 | C00042;C01234;C05984                      | hsa00640 |
| Nitrogen metabolism                         | 39 | 3 | 0.149 | 1.90 | 1.00 | 0.60 | 0.00 | C00078;C00049;C00108                      | hsa00910 |
| beta-Alanine metabolism                     | 28 | 3 | 0.070 | 2.66 | 1.00 | 0.37 | 0.00 | C00049;C00864;C00106                      | hsa00410 |
| One carbon pool by folate                   | 9  | 1 | 0.271 | 1.30 | 1.00 | 0.94 | 0.00 | C00504                                    | hsa00670 |
| D-Glutamine and D-glutamate metabolism      | 11 | 1 | 0.321 | 1.14 | 1.00 | 0.99 | 0.00 | C00026                                    | hsa00471 |
| Biotin metabolism                           | 11 | 1 | 0.321 | 1.14 | 1.00 | 0.99 | 0.00 | C00047                                    | hsa00780 |
| Cyanoamino acid metabolism                  | 16 | 1 | 0.431 | 0.84 | 1.00 | 1.00 | 0.00 | C00049                                    | hsa00460 |
| Histidine metabolism                        | 44 | 2 | 0.452 | 0.79 | 1.00 | 1.00 | 0.00 | C00049;C00026                             | hsa00340 |
| Galactose metabolism                        | 41 | 1 | 0.766 | 0.27 | 1.00 | 1.00 | 0.00 | C00159                                    | hsa00052 |
| Folate biosynthesis                         | 42 | 1 | 0.774 | 0.26 | 1.00 | 1.00 | 0.00 | C00504                                    | hsa00790 |
| Ascorbate and aldarate metabolism           | 45 | 1 | 0.797 | 0.23 | 1.00 | 1.00 | 0.00 | C00026                                    | hsa00053 |
| Fatty acid metabolism                       | 50 | 1 | 0.830 | 0.19 | 1.00 | 1.00 | 0.00 | C00489                                    | hsa00071 |

### Supplementary Figure legends

**Figure S1** ANGPTL8/betatrophin increases blood TG levels in KM mice. **(A)** TG concentration 30 min after recombinant ANGPTL8/betatrophin injection (i.p.) into 8-week-old mice (n = 6). **(B)** TG concentration, 0, 10, 30 and 60 min after recombinant ANGPTL8/betatrophin injection (i.p.) into 36-week-old mice (n = 6). The experiment was repeated three times. Data represent the mean  $\pm$  standard deviation (SD). r-betatrophin, recombinant ANGPTL8/betatrophin.

**Figure S2** Multivariate statistical analysis of metabolite profiles in HepG2/IR samples. **(A)** PCA score plot (n = 6). **(B-C)** PLS-DA score plots of metabolite profiles in positive ion mode and negative ion mode (n = 6). The ellipse area represents the 95% confidence interval by Hotelling T2 test. The red circle represents each sample in the wild type HepG2/IR group; the green triangle represents each sample in the *ANGPTL8/betatrophin* gene knockout HepG2/IR group. WT, wild type HepG2/IR; A, *ANGPTL8/betatrophin* gene knockout HepG2/IR.

**Figure S3** Metabolite correlation analysis. Color-marked part and the blank part were  $p < 0.05$  and  $p > 0.05$ , respectively. Positive correlations (red) with a correlation of up to 1 and negative correlations (blue) with a correlation of up to -1.

**Figure S4** Box-and-whisker plots showing the relative levels of up-regulated metabolites. Results of metabolite changed trends were expressed as normalized ratios (“\*”,  $p < 0.05$ ; “\*\*\*”,  $p < 0.01$ ). WT, wild type HepG2/IR; A, *ANGPTL8/betatrophin* knockout HepG2/IR.

**Figure S5** Box-and-whisker plots showing the relative levels of down-regulated metabolites. Results of metabolite changed trends were expressed as normalized ratios (“\*”,  $p < 0.05$ ; “\*\*\*”,  $p < 0.01$ ). WT, wild type HepG2/IR; A, *ANGPTL8/betatrophin* knockout HepG2/IR.

**Figure S1**

**A**

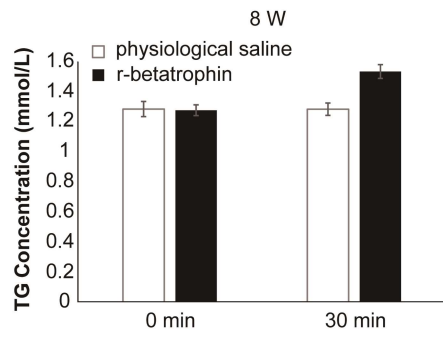

**B**

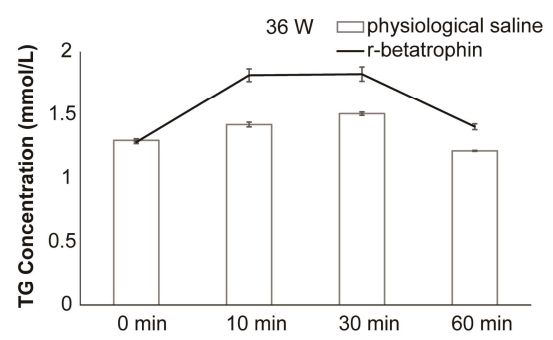



Figure S2

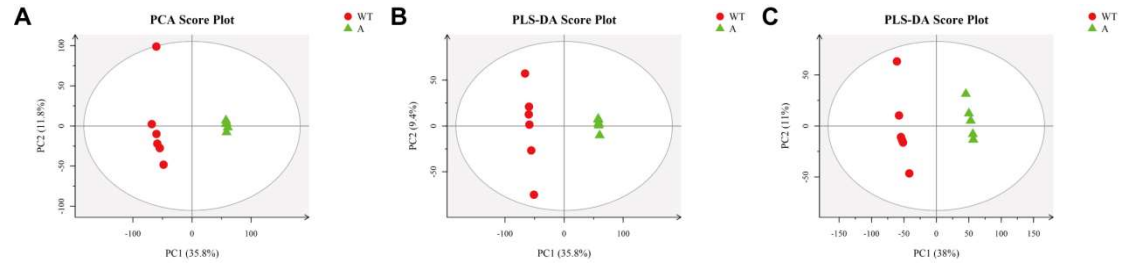

Figure S3

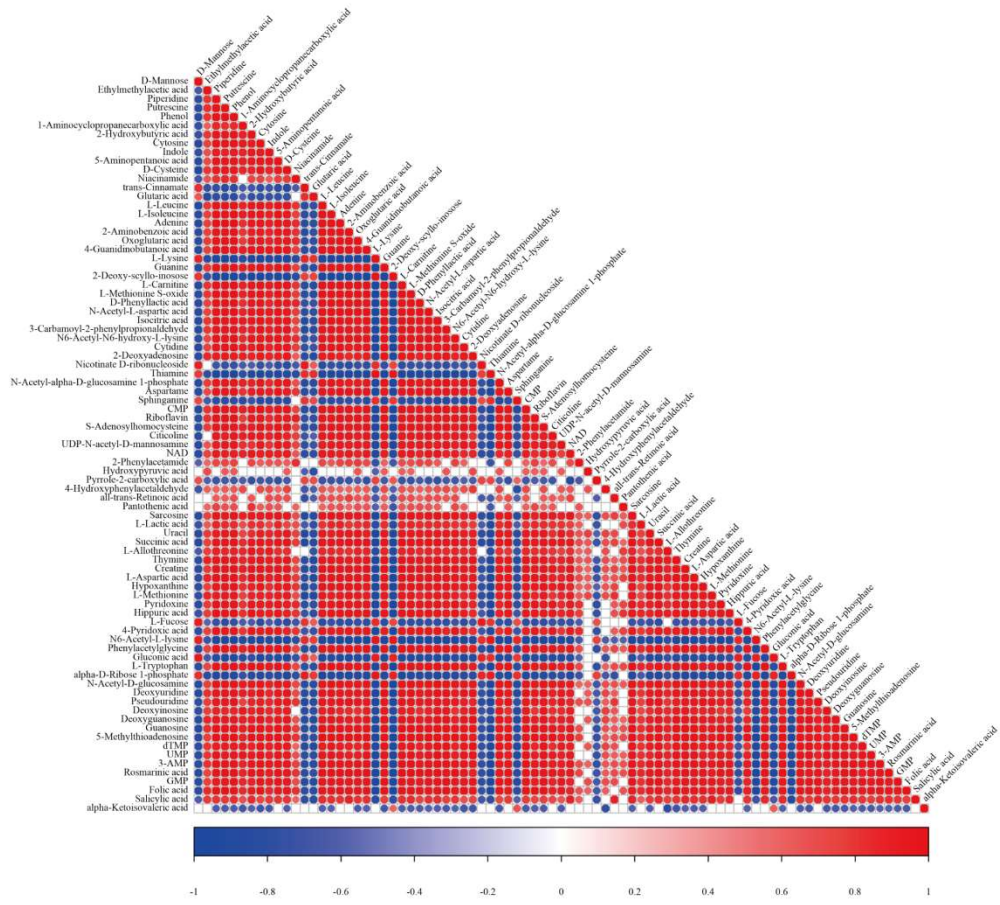

Figure S4

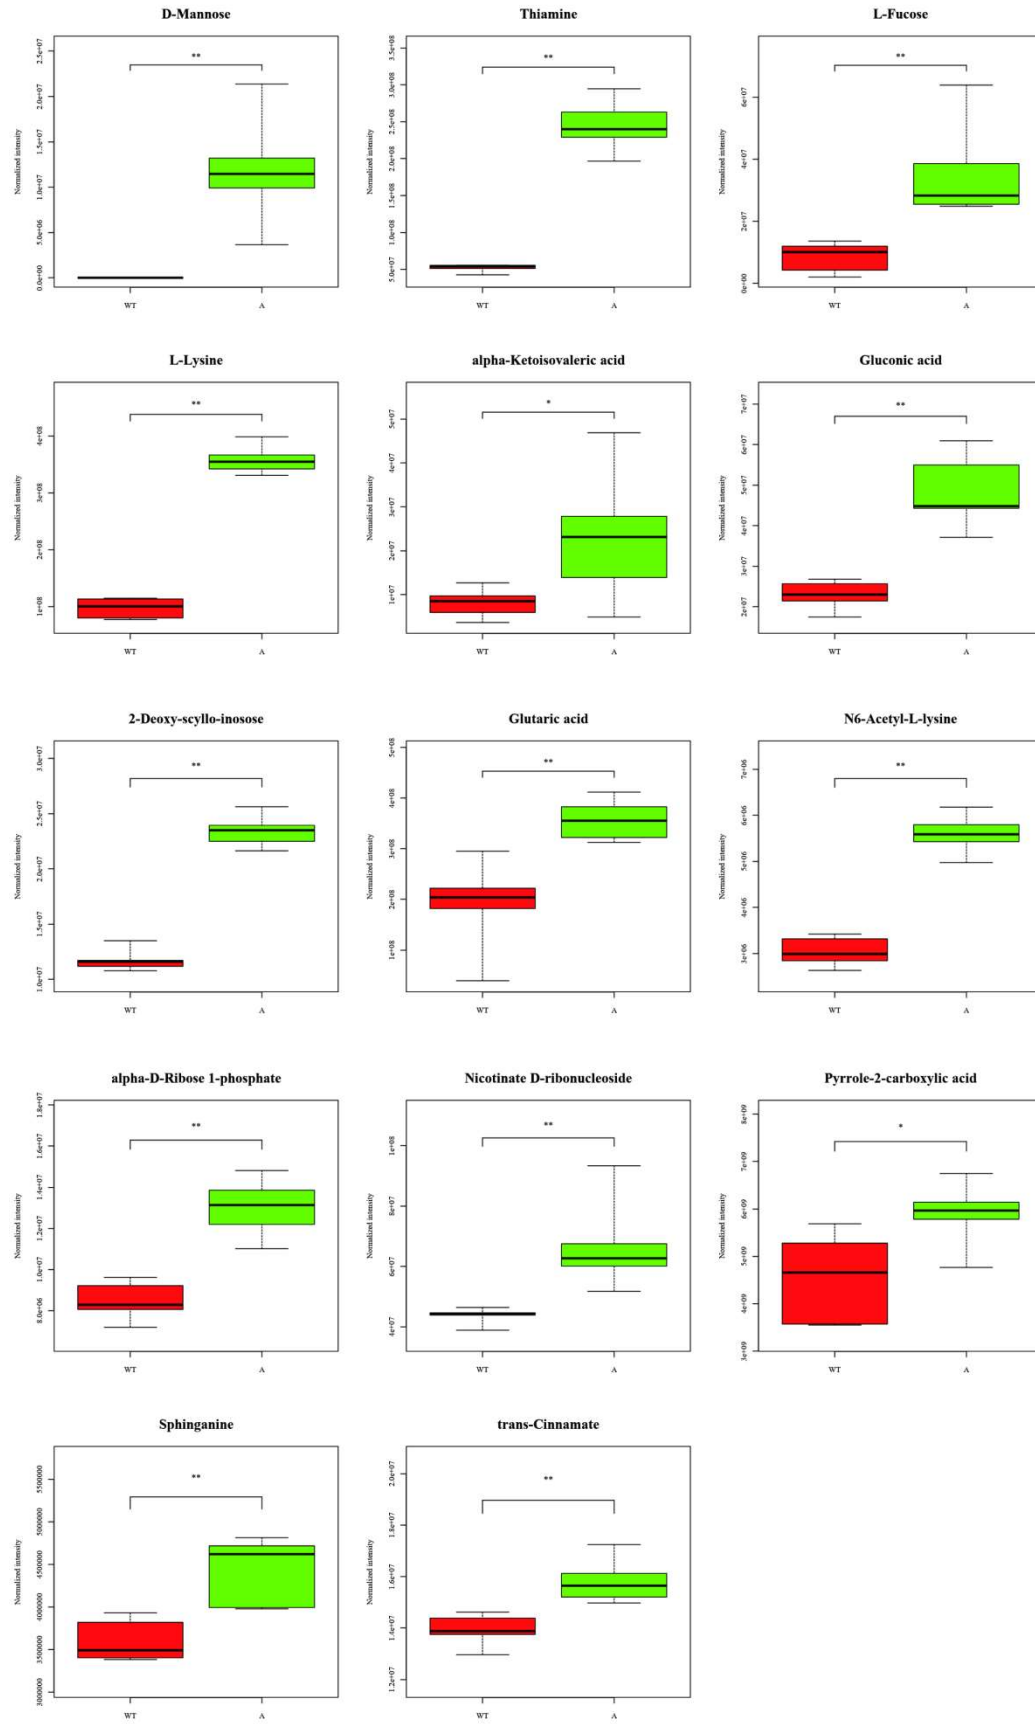

Figure S5

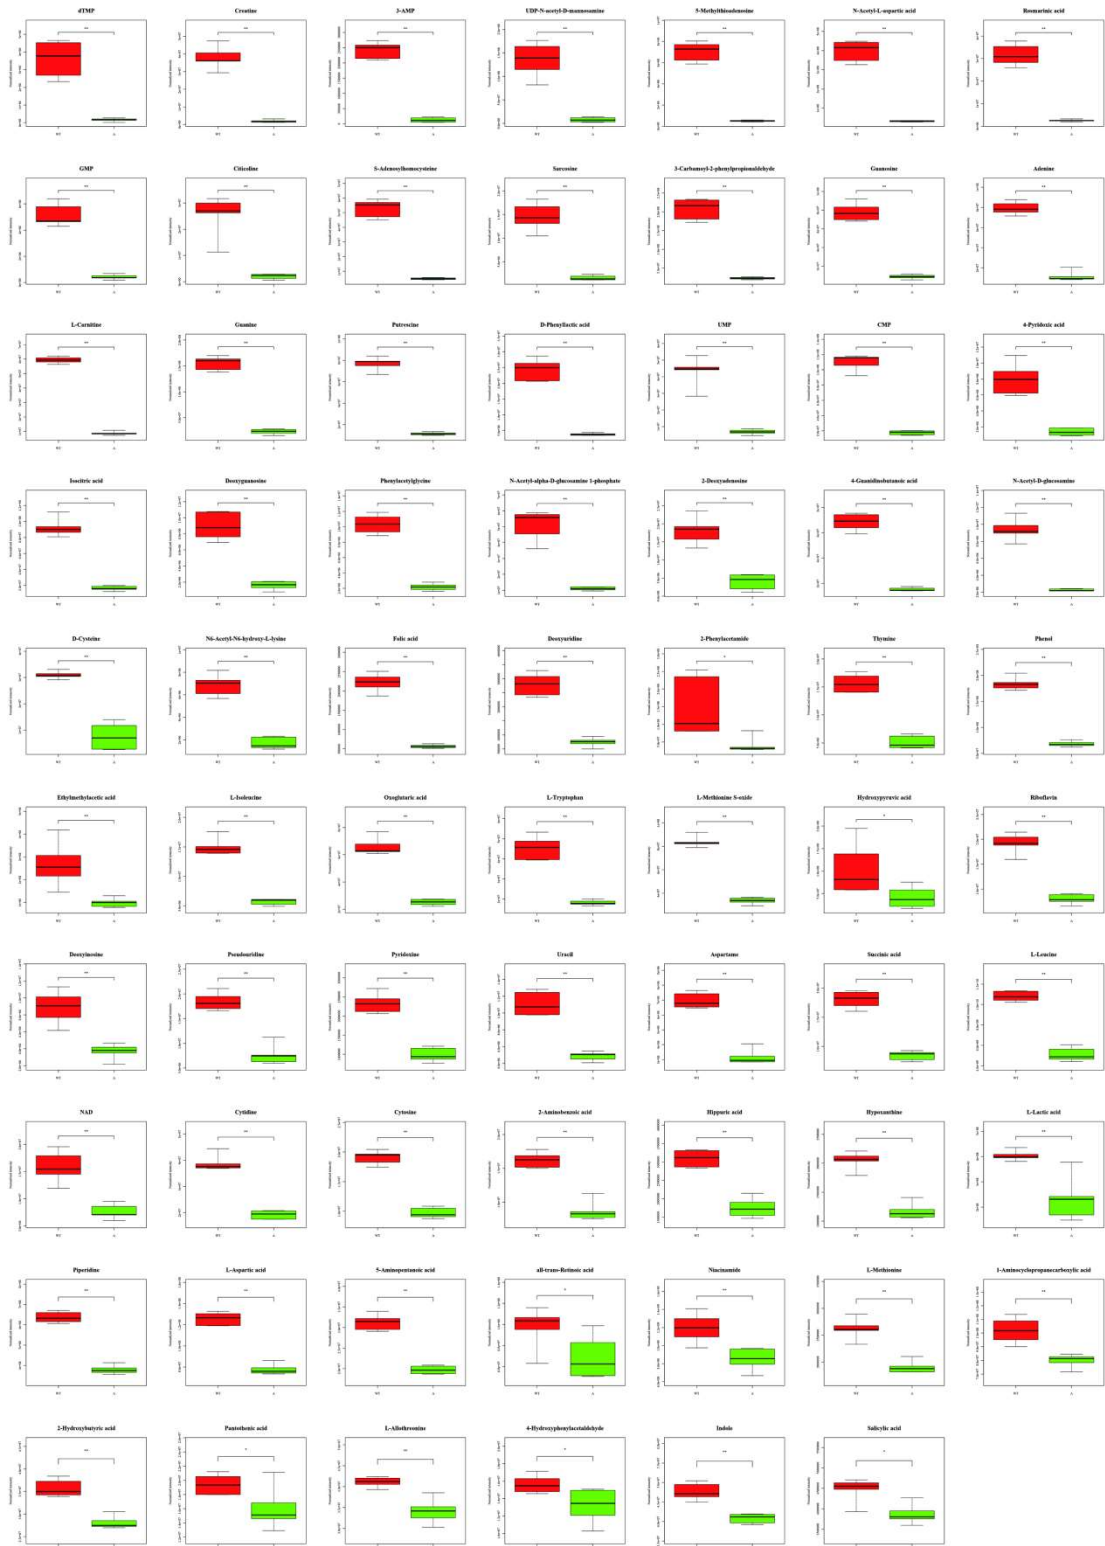

Supplement: Supplementary file 1 [file get_supplementary_file.php]
